# Supplementary material for: A facile and green one-step synthesis of Ag/reduced graphene oxide and its application in catalysts and SERS
Source: Royal Society of Chemistry journal article supplement (doi:10.1039/d5ra00001g), 2025-01-01
Supplement: d5ra00001g1.pdf [file d5ra00001g1.pdf]

## **Supporting information**

**A facile and green one-step building of Ag/reduced graphene oxide and its  
application for catalyst and SERS**

**Yanling Jia <sup>a</sup> and Ke Zhang <sup>b,c\*</sup>**

**Table S1** Preparation formula of Ag-rGO

| Experiment number | AgNO <sub>3</sub> amount /g | GO amount /g | Rutin amount /g | Time /h |
|-------------------|-----------------------------|--------------|-----------------|---------|
| 1                 | 2.5                         | 2.5          | 10              | 4       |
| 2                 | 2.5                         | 2.5          | 10              | 8       |
| 3                 | 2.5                         | 2.5          | 10              | 12      |
| 4                 | 0.5                         | 2.5          | 10              | 12      |
| 5                 | 1.5                         | 2.5          | 10              | 12      |
| 6                 | 5                           | 2.5          | 10              | 12      |
| 7                 | 2.5                         | 2.5          | 5               | 12      |
| 8                 | 2.5                         | 2.5          | 20              | 12      |

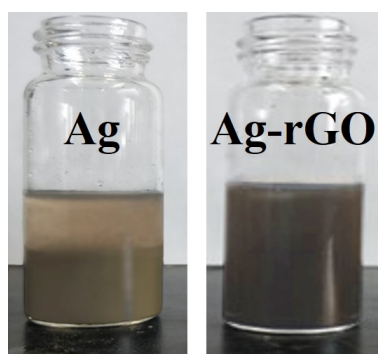

**Fig.S1** Digital photos of Ag and Ag-rGO dispersions after storage for 5 days

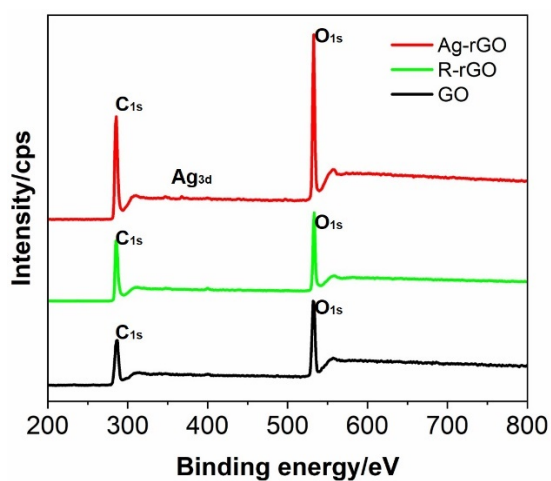

**Fig.S2** XPS spectra: Survey spectra of GO, R-rGO, and Ag-rGO

**Table S2** The contents of C and O in the GO, R-rGO and Ag-rGO (wt.%)

|        | C     | O     | Ag   | C/O  |
|--------|-------|-------|------|------|
| GO     | 62.97 | 37.02 | -    | 1.70 |
| R-rGO  | 71.73 | 28.17 | -    | 2.55 |
| Ag-rGO | 69.36 | 27.64 | 3.01 | 2.51 |

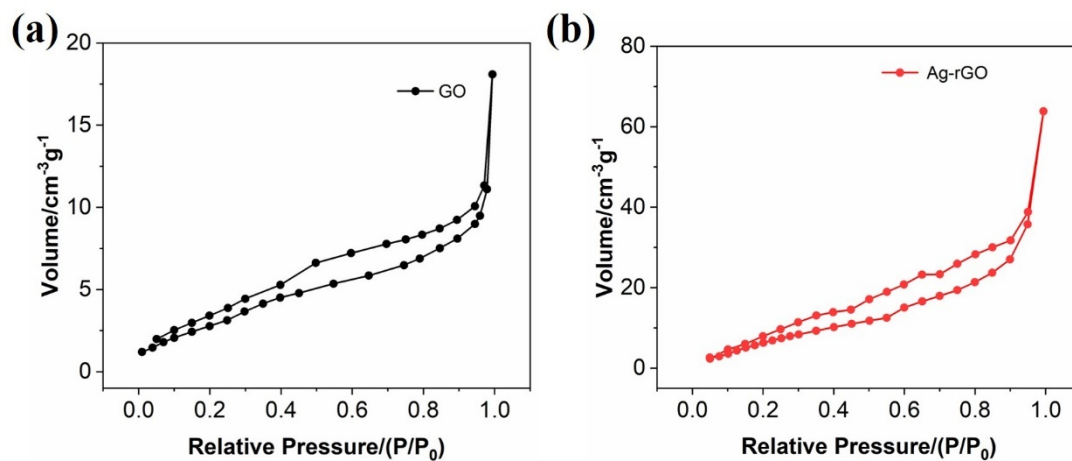**Fig.S3** The Adsorption/desorption isotherm plot of GO(a) and Ag-rGO(b)**Table S3** BET surface area, pore volume, and average pore size in GO and Ag-rGO

|        | Surface areas (m <sup>2</sup> /g) | Pore volume (cm <sup>3</sup> /g) | Average pore size (nm) |
|--------|-----------------------------------|----------------------------------|------------------------|
| GO     | 12.01                             | 0.02                             | 3.10                   |
| Ag-rGO | 35.67                             | 0.03                             | 3.79                   |

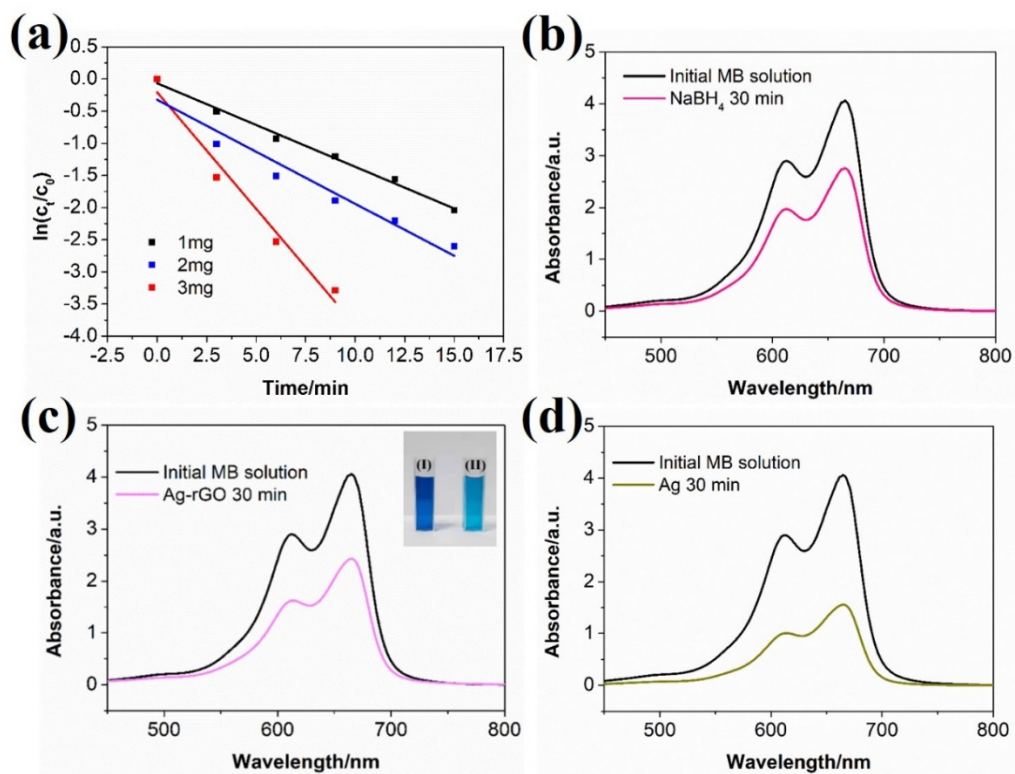

**Fig.S4** (a) Variation of  $\ln c_t/c_0$  with reaction time when the addition amount of Ag-rGO is 1 mg, 2 mg, and 3 mg; (b) UV-vis spectra of MB solution after reduced by  $\text{NaBH}_4$ ; (c) UV-vis spectra of MB solution in presence of Ag-rGO; (d) UV-vis spectra of MB solution after reduced by  $\text{NaBH}_4$  when the addition amount of Ag is 3 mg

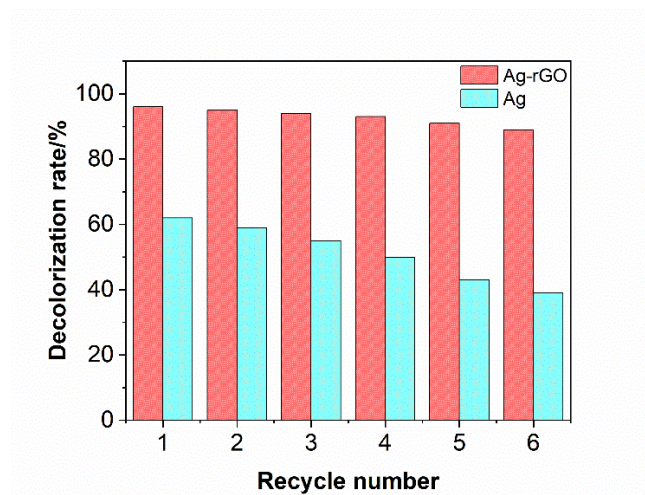

**Fig.S5** The stability of Ag and Ag-rGO

**Table S4** Reproducibility analysis of SERS signals collected from different positions on the same substrate or from different substrates of Ag-rGO or Ag

| Peak position<br>(cm <sup>-1</sup> ) | From different positions on the same<br>substrate, D/% |              | From different substrates, D/% |              |
|--------------------------------------|--------------------------------------------------------|--------------|--------------------------------|--------------|
|                                      | Ag-rGO substrate                                       | Ag substrate | Ag-rGO substrate               | Ag substrate |
| 612                                  | 5.32                                                   | 7.69         | 6.77                           | 9.07         |
| 774                                  | 4.95                                                   | 7.34         | 5.65                           | 8.63         |
| 1179                                 | 7.01                                                   | 9.65         | 7.79                           | 10.63        |
| 1363                                 | 6.73                                                   | 7.79         | 7.51                           | 9.79         |
| 1512                                 | 6.65                                                   | 7.43         | 7.33                           | 9.61         |
